# Supplementary material
Source: PubMed Central journal article supplement (PMC4011467)
Supplement: supp_WNL.0000000000000367_Figure_e-1.pdf [file supp_WNL.0000000000000367_Figure_e-1.pdf]

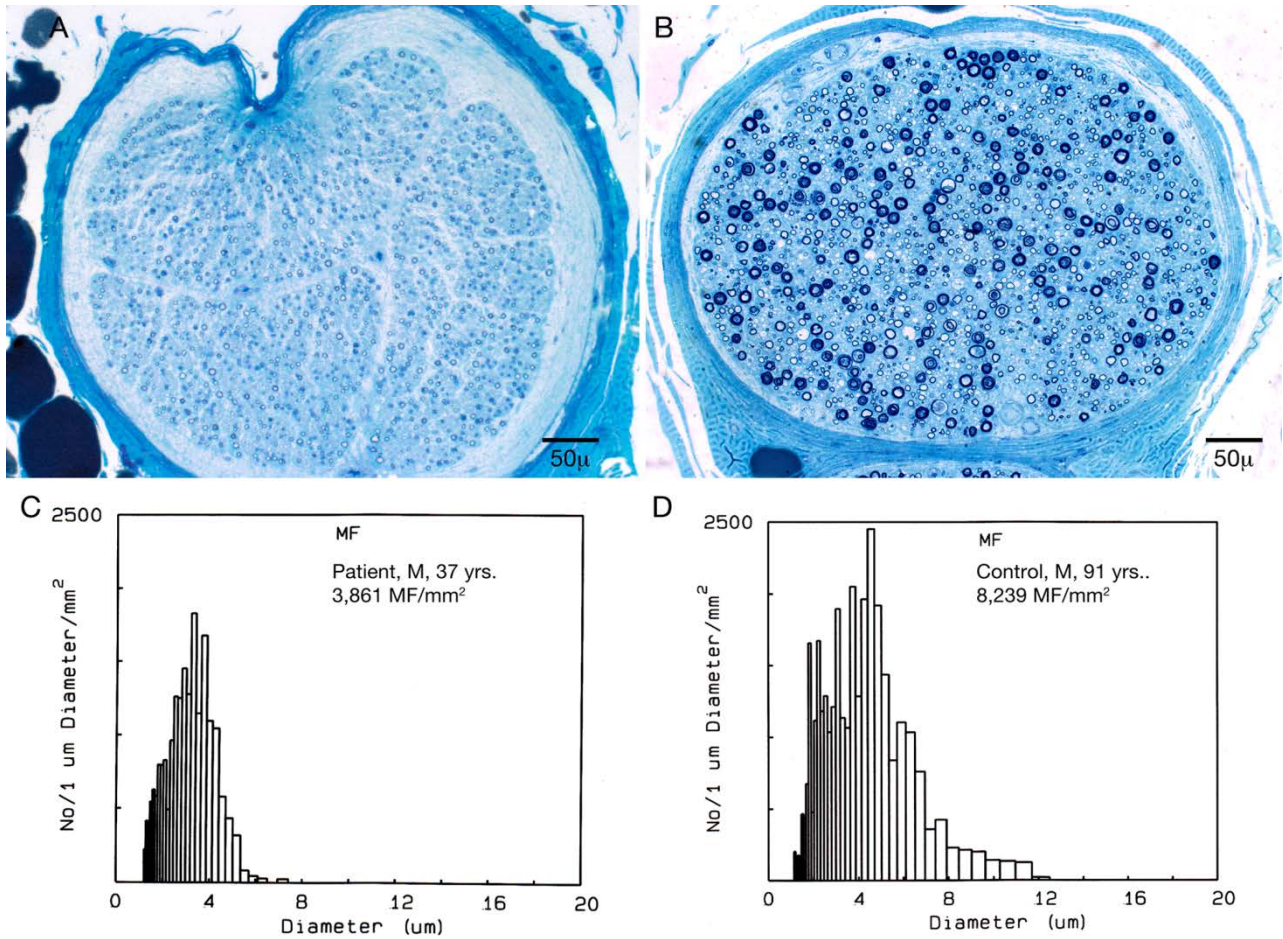

**Figure e-1** All cases had loss of myelinated fibers with a size shift to small and intermediate size consistent with fiber loss and regeneration. As example in semithin preparation of case 3 (A), morphometric analysis (C) shows the large myelinated fiber density was 3861mf/mm<sup>2</sup> compared with control (B) semithin preparation morphometrics (D) 8239mf/mm<sup>2</sup> in the control specimen.
